# Supplementary material for: Social experience shapes fighting strategies in Drosophila
Source: eLife. 2025 Oct 7;13:RP104212. doi: 10.7554/eLife.104212 (PMC12503488; doi:10.7554/eLife.104212)
Supplement: Figure 1—figure supplement 1—source data 1. [file elife-104212-fig1-figsupp1-data1.xlsx]

## Sheet: figure 1- figure supplement 1A
lunge latency (sec)
S7	S14	G7	G14
318	922	533	1800
255	372	402	950
199	303	396	732
136	241	327	669
93	203	270	1800
37	147	301	431
38	35	83	482
24	91	46	100
23	59	96	51
55	78	152	175
132	147	40	157
131	203	246	357

## Sheet: figure 1- figure supplement 1B
No. of lunges in 10 min
S7	S14	G7	G14
32	42	29	21
41	31	11	2
40	28	18	8
44	18	16	9
78	10	24	0
69	23	9	16
52	26	10	9
63	47	18	0
49	33	22	17
53	19	26	11
46	27	18	14
73	25	19	15
