# Supplementary material for: Social experience shapes fighting strategies in Drosophila
Source: eLife. 2025 Oct 7;13:RP104212. doi: 10.7554/eLife.104212 (PMC12503488; doi:10.7554/eLife.104212)
Supplement: Figure 1—source data 1. [file elife-104212-fig1-data1.xlsx]

## Sheet: figure 1B
tussle latency (min)							No. of tussles in 2 hr							% males perform tussling
NF_2d	FF_2d	NF_7d	FF_7d	NF_14d	FF_14d		NF_2d	FF_2d	NF_7d	FF_7d	NF_14d	FF_14d		NF_2d	FF_2d	NF_7d	FF_7d	NF_14d	FF_14d
120	120	120	16	120	19		0	0	0	6	0	1		0	0	6.7	38.1	17.3	54.3
120	120	87	120	87	120		0	0	1	0	2	0
120	120	120	34.5	120	29		0	0	0	1	0	2
120	120	101	39	101	29.5		0	0	1	2	1	2
120	120	120	120	120	75.5		0	0	0	0	0	1
120	120	120	106	120	120		0	0	0	1	0	2
120	120	120	120	120	120		0	0	0	0	0	0
120	120	120	120	120	120		0	0	0	0	0	0
120	120	120	120	120	120		0	0	0	0	0	0
120	120	120	120	120	120		0	0	0	0	0	0
120	120	120	120	120	73.5		0	0	0	0	0	3
120	120	120	120	120	53		0	0	0	0	0	6
120	120	120	120	120	31.5		0	0	0	0	0	2
120	120	120	120	120	120		0	0	0	0	0	0
120	120	120	17.5	120	49.5		0	0	0	3	0	4
120	120	120	57	35	23.5		0	0	0	1	2	4
120	120	120	120	120	120		0	0	0	0	0	0
120	120	120	120	120	120		0	0	0	0	0	0
120	120	120	120	120	120		0	0	0	0	0	0
120	120	120	86.5	120	50		0	0	0	2	0	3
120	120	120	120	120	120		0	0	0	0	0	0
120	120	120	47.5	120	120		0	0	0	2	0	0
120	120	120	57.5	120	34.5		0	0	0	2	0	5
120	120	120	120	120	96		0	0	0	0	0	2
120	120	120	120	120	49		0	0	0	0	0	3
120	120	120	120	120	58		0	0	0	0	0	3
120	120	120	120	120	120		0	0	0	0	0	0
120	120	120	120	120	120		0	0	0	0	0	0
120	120	120	120	120	120		0	0	0	0	0	0
120	120	120	54.5	120	120		0	0	0	1	0	0
			33.5	120	33					3	0	3
			120	120	120					0	0	0
			120	120	120					0	0	0
			50	22.5	120					2	3	0
			120	120	46					0	0	2
			120	120	120					1	0	0
			11	120	54					3	0	6
			120	120	120					0	0	0
			120	92	114					0	1	1
			21.5	120	40					2	0	2
			120	55.5	14					0	1	1
			120	120	15					0	0	7
			120	120	6					0	0	5
			120	89	23					0	1	4
			61	116	11					0	1	3
			32	120	37					2	0	6

## Sheet: figure 1C
tussle latency (min)						No. of tussles in 2 hr						% males perform tussling
0	2.5	5	10	Sucrose (%)		0	2.5	5	10	Sucrose (%)		0	2.5	5	10	Sucrose (%)
120	120	120	4.5			0	0	0	5			46.7	50	40	50
120	6	28	120			0	2	3	0
21	6.5	120	120			6	3	0	0
120	120	5.5	6			0	0	6	6
21	33	120	120			2	4	0	0
23	22.5	120	120			2	0	0	0
120	120	42	22.5			0	0	4	3
34	94.5	120	120			6	2	0	0
14.5	56.5	120	65			3	2	0	1
6.5	120	120	120			3	0	0	0
120	45.5	120	16			0	3	0	3
120	120	11	120			0	0	5	0
120	120	120	36			0	0	0	5
120	7	6.5	120			0	5	6	0
9.5	120	120	78			4	0	0	1
120	43	15.5	8			0	2	4	3
120	120	120	120			0	0	0	0
120	15.5	14	120			0	5	4	0
7.5	120	120	7			6	0	0	4
120	120	7	120			0	0	3	0
49.5	120	120	96			3	0	0	1
120	26.5	9.5	120			0	2	0	0
12.5	89	120	12.5			3	1	0	6
120	120	31	120			0	0	3	0
28	18.5	25	87.5			3	4	1	1
42	10	120	120			1	2	0	0
120	120	8.5	10			0	0	4	4
120	53.5	120	120			0	2	0	0
16	120	89	14.5			5	0	1	0
34.5	11.5	120	18			2	6	0	3

## Sheet: figure 1D
tussle latency (min)						No. of tussles in 2 hr						% males perform tussling
0	2.5	5	10	Yeast (%)		0	2.5	5	10	Yeast (%)		0	2.5	5	10	Yeast (%)
18.5	15	25	19			2	3	4	2			16.7	46.7	53.3	73.3
120	120	120	17			0	0	0	3
120	6	93	21			0	2	1	2
120	120	120	22			0	0	0	4
120	33	37	13			0	4	3	6
120	22.5	28	17			0	0	2	3
120	120	45.5	18			0	0	1	8
5.5	94.5	120	31			2	2	0	2
120	56.5	120	9.5			0	2	0	1
120	120	6	107			0	0	7	1
42	120	120	15			1	0	0	1
120	120	41	51			0	0	3	1
120	120	101	23.5			0	0	1	9
120	120	120	43			0	0	0	4
120	120	11	120			0	0	4	0
120	43	120	46			0	2	0	6
120	120	22	120			0	0	3	0
120	15.5	120	6			0	5	0	3
120	120	16	120			0	0	2	0
120	114	13	41			0	1	4	1
120	120	120	23			0	0	0	2
120	26.5	10.5	25.5			0	2	2	3
120	89	120	78			0	3	0	2
120	120	60	19.5			0	0	2	6
120	18.5	120	120			0	3	0	0
120	10	28.5	120			0	4	3	0
120	120	120	120			0	0	0	0
19	102	120	120			1	1	0	0
23.5	120	120	5			1	0	0	6
120	13	86	120			0	5	2	0
