# Supplementary material for: Social experience shapes fighting strategies in Drosophila
Source: eLife. 2025 Oct 7;13:RP104212. doi: 10.7554/eLife.104212 (PMC12503488; doi:10.7554/eLife.104212)
Supplement: Figure 2—source data 1. [file elife-104212-fig2-data1.xlsx]

## Sheet: figure 2C
tussle latency (min)
SH	GH
120	20.5
120	16
120	20.5
120	120
89	13
120	17
120	18
120	28.5
120	9.5
59	120
120	15
120	51
120	28
120	49.5
120	120
120	31
120	120
120	6
120	120
120	38.5
120	23
1	25.5
120	84
120	19.5
120	120
120	120
120	83
	5
	120
	120

## Sheet: figure 2D
No. of tussles in 2 hr
SH	GH
0	2
0	3
0	2
0	0
1	6
0	3
0	8
0	2
0	1
1	0
0	1
0	1
0	9
0	3
0	0
0	5
0	0
0	3
0	0
0	1
0	2
6	2
0	2
0	6
0	0
0	0
0	2
	6
	0
	0

## Sheet: figure 2E
lunge latency (sec)
SH	GH
28	345.39
34	311.3
49	234.02
69	394.55
113	505
78	343
22	721
263	145
19	111.3
71	34
11	194
38	654
64	303
244	309
46	211
127	63
98	739
68	554
372	498
29	739
96	145
57	547
65	486
123	514
28	286
46	555
254	681
	49
	531
	643

## Sheet: figure 2F
No. of lunges in 10 min
SH	GH
75	5
45	3
108	2
42	8
23	6
69	31
53	9
72	12
46	3
21	0
55	7
33	4
40	8
69	0
36	7
45	2
40	19
31	6
86	6
51	17
8	3
46	8
22	1
49	7
53	11
66	13
17	5
	21
	3
	10

## Sheet: figure 2G
Duration (sec)
Lunging	Tussling
0.1	14
0.13	17
0.13	5
0.13	46
0.07	45
0.1	76
0.17	14
0.1	31
0.1	7
0.1	14
0.07	21
0.1	25
0.1	72
0.17	139
0.1	79
0.13	62
0.17	45
0.1	40
0.1	56
0.17	17
0.1	215
0.17	193
0.1	25
0.1	30
0.07	10
0.13	88
0.1	29
0.13	28
0.1	31
0.1	5
