# Supplementary material for: Social experience shapes fighting strategies in Drosophila
Source: eLife. 2025 Oct 7;13:RP104212. doi: 10.7554/eLife.104212 (PMC12503488; doi:10.7554/eLife.104212)
Supplement: Figure 3—figure supplement 1—source data 1. [file elife-104212-fig3-figsupp1-data1.xlsx]

## Sheet: figure 3 - figure supplement 1A
Relative mRNA level
Or47b-GAL4/+	Or47b-GAL4>UAS-Or47b-RNAi
0.990524	0.534256
1.03259	0.491748
0.976888	0.510353

## Sheet: figure 3 - figure supplement 1B
Relative mRNA level
fruGal4/+	fruGAL4>UAS-fruMi
1.04889	0.606638
0.951891	0.645965
0.999216	0.614139
