# Supplementary material for: Social experience shapes fighting strategies in Drosophila
Source: eLife. 2025 Oct 7;13:RP104212. doi: 10.7554/eLife.104212 (PMC12503488; doi:10.7554/eLife.104212)
Supplement: Figure 3—figure supplement 2—source data 1. [file elife-104212-fig3-figsupp2-data1.xlsx]

## Sheet: figure 3 - figure supplement 2B
fluorescence intensity of ROI (x1000)
GH	SH
8484.8	6504.22
8324.07	6217.83
9236.94	5286.24
7489.83	5921.03
7750.82	5681.16
8938.7	5704.93
10153.7	5414.65
9624.75	5946.26
7503.85
9602.72
