# Supplementary material for: Social experience shapes fighting strategies in Drosophila
Source: eLife. 2025 Oct 7;13:RP104212. doi: 10.7554/eLife.104212 (PMC12503488; doi:10.7554/eLife.104212)
Supplement: Figure 3—source data 1. [file elife-104212-fig3-data1.xlsx]

## Sheet: figure 3A
tussle latency (min)
UAS-kir2.1/+	Or67d-GAL4/UAS-kir2.1	Or65a-GAL4/+;UAS-kir2.1/+	Or47b-GAL4/UAS-kir2.1	Ir84a-GAL4/UAS-kir2.1
45.2	26.7667	6.68333	51.6833	120
120	26.8167	20.8167	120	21.4833
29.8667	36.4667	6.76667	120	120
120	120	26.8333	28.7333	120
26.5	20.6833	120	7.2	120
19.9667	31.7167	120	120	120
32.15	68.8333	120	81.9833	14.4
18.7	120	120	120	23
18.2833	42.05	30.05	120	21.1667
34.3833	59.4167	120	120	4.35
21.7167	120	13.2333	41.3	120
120	120	51.2333	120	24.7167
25.6333	120	56.2833	120	25.5833
120	29.8667	33.5333	120	120
120	120	11.3333	120	120
120	45.4167	120	34.3667	26.6
34.8667	110.467	87.5167	120	120
120	102.2	25.1667	120	120
120	120	14.0167	120	75.7167
120	120	120	120	33.9
48.9833	120	120	120	120
17.0833	120	25.2333	120	20.3167
120	18.5833	120	90.0167	55.3
75.4167	3.38333	120	36.1833	111.15
11.3167	80.4333	120	120	6.48333
3.76667	34.7167	120	120	43.15
19.1333	120	19.8167	120	35.4667
51.2667	120	15.0833	120	48.0833
15.35	28.2833	4.21667	44.45	120
55.1667	34.3	14.7167	120	0

## Sheet: figure 3B
No. of tussles in 2 hr
UAS-kir2.1/+	Or67d-GAL4/UAS-kir2.1	Or65a-GAL4/UAS-kir2.1	Or47b-GAL4/UAS-kir2.1	Ir84a-GAL4/UAS-kir2.1
2	3	4	1	0
0	3	6	0	3
4	2	4	0	0
0	0	3	3	0
2	5	0	2	0
4	2	0	0	0
2	5	0	2	2
3	0	0	0	3
3	3	4	0	3
5	2	0	0	3
3	0	5	1	0
0	0	2	0	4
3	0	2	0	1
0	4	3	0	0
0	0	2	0	0
0	2	0	1	3
5	1	2	0	0
0	1	4	0	0
0	0	4	0	1
0	0	0	0	4
3	0	0	0	0
2	0	3	0	3
0	5	0	2	3
2	8	0	1	1
3	1	0	0	2
3	3	0	0	1
4	0	3	0	3
1	0	2	0	4
6	3	4	2	0
4	7	5	0	0

## Sheet: figure 3C
lunge latency (sec)
UAS-kir2.1/+	Or67d-GAL4/UAS-kir2.1	Or65a-GAL4/+;UAS-kir2.1/+	Or47b-GAL4/UAS-kir2.1	Ir84a-GAL4/UAS-kir2.1
204	1077	186	252	1092
306	513	321	498	405
138	285	156	444	408
366	408	474	279	209
875	531	336	906	432
246	453	186	42	14
402	1170	504	276	972
162	411	165	384	69
228	1302	216	441	327
1364	474	510	237	438
324	1800	153	372	163
157	417	14	1053	827
546	573	411	126	267
415	1464	288	540	372
19	438	1657	445	318
522	939	474	222	39
327	234	570	306	501
49	1800	537	18	171

## Sheet: figure 3D
No. of lunges in 10 min
UAS-kir2.1/+	Or67d-GAL4/UAS-kir2.1	Or65a-GAL4/+;UAS-kir2.1/+	Or47b-GAL4/UAS-kir2.1	Ir84a-GAL4/UAS-kir2.1
8	0	10	9	0
4	1	4	2	2
15	7	10	3	4
4	4	2	5	10
0	2	6	0	4
12	1	13	16	27
4	0	4	6	0
9	4	14	10	12
10	0	10	4	2
0	2	2	8	1
4	0	17	10	8
14	1	16	0	0
2	2	2	11	3
5	0	4	2	8
31	2	0	4	6
2	0	2	8	15
4	2	4	4	2
13	0	6	26	8

## Sheet: figure 3E
tussle latency (min)
Or47b-GAL4/+	Or47b-GAL4/UAS-Or47b-RNAi	Or47b-GAL4/UAS-fru-RNAi
17.7	120	5.61667
120	120	120
8.23333	34.85	120
21	120	7.3
7.8	120	6.98333
8.08333	120	120
120	120	6.41667
15	120	6.26667
18.1	120	4.6
7.66667	120	22.75
120	22.2167	8.46667
120	120	120
23.5	120	4.61667
3	120	120
5.3	53.9833	5.98333
3.75	120	120
8.48333	120	10.3667
14.7833	120	120
45.2	57.15	12.2667
3.65	120	120
23.9667	75.5833	7.68333
17	120	8.8
13.05	120	120
5.33333	120	120
16.3333	120	10.9
4.33333	120	46.8833
5.68333	120	120
7.41667	120	120
120	43.6167	120
17.4833	15.3833	26.1167

## Sheet: figure 3F
No. of tussles in 2 hr
Or47b-GAL4/+	Or47b-GAL4/UAS-Or47b-RNAi	Or47b-GAL4/UAS-fru-RNAi
2	0	7
0	0	0
2	2	0
1	0	2
1	0	7
4	0	0
0	0	4
1	0	7
4	0	2
3	0	3
1	1	1
0	0	0
5	0	9
5	0	0
7	1	5
4	0	0
4	0	6
5	0	0
2	3	2
5	0	0
1	1	3
3	0	6
4	0	0
13	0	0
5	0	3
7	0	3
3	0	0
1	0	0
0	1	0
3	2	3

## Sheet: figure 3G
tussle latency (min)
Or47bGAL4/+_G14	Or47bGAL4/UAS-NaChBac_G14	Or47bGAL4/+_S14	Or47bGAL4/UAS-NaChBac_S14
6.73	17.65	120	14.63
56.11	5.68	120	118.21
25.12	120	120	44.07
32.7	4.76	120	23.35
31.68	43.72	120	29.29
120	22.41	56.75	11.53
2.98	28.52	120	120
41.28	10.24	120	11.49
9.92	35.29	88.26	10.31
6.93	112.94	120	22.93
5.72	8.99	23.79	48.79
18.7	21.97	120	27.84
45.31	48.58	120	9.79
23.75	27.02	120	21.02
118.92	8.45	120	120
16.73	20	120	26.75
32.83	120	44.68	17.16
11.21	54.87	120	14.11
12.77	16.04	120	78.74
9.63	12.9	120	25.94
76.12	79.39	120	17.96
21.8	25.07	120	29.48
18.15	10.96	120	45.76
120	28.71	120	4.95
28.23	43.23	120	7.94
16.98	3.48	120	15.83
21.21	61.48	120	110.55
16.29	14.67	120	44.28
10.18	10.31	120	15.84
5.78	43.94	120	22.19
15.83	14.68	120	35.91
120	21.21	120	8.65
40.35	35.33	113.9	58.28
120	120	101.5	34.92
115.92	58.34	120	42.76
96.06	34.31	120	23.54
41.75	42.37	120	30.73
48.81	22.6	120	120
19.55	30	55.21	113.48
57.84	97.86	120	24.69
79.54	23.55	120	20.13
120	120	120	28.93
63.21	120	120	120
39.18	28.15	120	11.07
34.89	5.88	120	12.75
27.47	9.77	120	34.6
34.87	11.5	26.83	12.01
102.73	33.98	120	15.2
120	120	120	23.78
4.58	14.02	120
15.47	4.48	120
48.95	42.68	120
120	5.37	120
116.91	120	120
13.95	7.96	120
27.54	17.28	120
8.7	23.44	120
120	61.23	31.52
12.63	2.16	120
34.58	120	120

## Sheet: figure 3H
No. of tussles in 2 hr
Or47bGAL4/+_G14	Or47bGAL4/UAS-NaChBac_G14	Or47bGAL4/+_S14	Or47bGAL4/UAS-NaChBac_S14
5	4	0	6
4	4	0	1
4	0	0	3
6	7	0	7
4	3	0	7
0	4	0	5
13	3	1	0
5	4	0	5
4	4	0	4
6	2	1	6
6	7	0	2
6	4	3	3
3	2	0	8
4	5	0	3
1	6	0	0
4	6	0	6
5	3	0	3
3	2	2	8
4	3	0	3
5	4	0	5
3	3	0	4
4	6	0	5
3	8	0	3
0	3	0	6
5	4	0	9
3	5	0	6
7	6	0	2
2	2	0	3
3	4	0	7
9	3	0	2
3	4	0	3
5	4	0	9
2	4	0	3
0	0	1	5
1	2	1	1
1	3	0	4
2	1	0	4
2	6	0	0
5	5	0	1
2	1	3	7
1	2	0	6
0	0	0	6
2	0	0	0
3	2	0	8
4	3	0	7
1	0	0	4
4	3	0	6
1	0	2	4
0	0	0	2
5	5	0
6	9	0
4	3	0
0	10	0
1	0	0
8	7	0
2	5	0
3	6	0
0	2	0
9	3	4
4	0	0
