# Supplementary material for: Social experience shapes fighting strategies in Drosophila
Source: eLife. 2025 Oct 7;13:RP104212. doi: 10.7554/eLife.104212 (PMC12503488; doi:10.7554/eLife.104212)
Supplement: Figure 4—figure supplement 1—source data 1. [file elife-104212-fig4-figsupp1-data1.xlsx]

## Sheet: figure4 - figure supplement 1B 
tussle or not within 10 min (%)
	22C						30C
GAL4	-	P1a	pC1-SS2	-	P1a	pC1-SS2	-	P1a	pC1-SS2	-	P1a	pC1-SS2
Light	+	+	+	-	-	-	+	+	+	-	-	-
Yes	0	0	0	0	0	0	0	94.4	94.4	0	0	33.3
No	100	100	100	100	100	100	100	5.6	5.6	100	100	66.7
total tussling time within 10 min (sec)
	22C						30C
GAL4	-	P1a	pC1-SS2	-	P1a	pC1-SS2	-	P1a	pC1-SS2	-	P1a	pC1-SS2
Light	+	+	+	-	-	-	+	+	+	-	-	-
	0	0	0	0	0	0	0	56	28	0	0	0
	0	0	0	0	0	0	0	31	44	0	0	47
	0	0	0	0	0	0	0	38	69	0	0	0
	0	0	0	0	0	0	0	29	92	0	0	0
	0	0	0	0	0	0	0	106	46	0	0	32
	0	0	0	0	0	0	0	14	44	0	0	0
	0	0	0	0	0	0	0	142	6	0	0	0
	0	0	0	0	0	0	0	114	88	0	0	58
	0	0	0	0	0	0	0	27	94	0	0	0
	0	0	0	0	0	0	0	2	29	0	0	54
	0	0	0	0	0	0	0	4	2	0	0	0
	0	0	0	0	0	0	0	60	26	0	0	0
	0	0	0	0	0	0	0	73	0	0	0	13
	0	0	0	0	0	0	0	0	1	0	0	0
	0	0	0	0	0	0	0	40	6	0	0	0
	0	0	0	0	0	0	0	110	203	0	0	7
	0	0	0	0	0	0	0	53	49	0	0	0
	0	0	0	0	0	0	0	52	45	0	0	0
