# Supplementary material for: Social experience shapes fighting strategies in Drosophila
Source: eLife. 2025 Oct 7;13:RP104212. doi: 10.7554/eLife.104212 (PMC12503488; doi:10.7554/eLife.104212)
Supplement: Figure 4—source data 1. [file elife-104212-fig4-data1.xlsx]

## Sheet: figure 4A
tussle latency (min)
UAS-Kir2.1/+	R19B03-GAL4>UAS-Kir2.1	P1a-split-GAL>UAS-Kir2.1	TK-GAL4>UAS-Kir2.1	pC1-SS1>UAS-Kir2.1	pC1-SS2>UAS-Kir2.1
105.91	48.51	35.15	52.01	100.4	120
30.27	42.21	58.71	54.07	82.6	120
24.81	18.43	46.31	73.44	86.3	120
37.25	59.07	8.34	120	72.6	120
42.23	25.69	112	70.61	58.8	120
14.69	37.45	14.79	79.46	53.6	46.6
120	27.33	120	30.3	49.6	120
10.53	120	34.32	45.62	41.4	120
16.93	33.52	120	64.95	120	120
95.17	73.94	4.54	71.76	76.4	120
86.67	53.58	16.16	98.2	71.4	67.6
120	6.95	15.21	34.24	47.6	120
24.6	63.72	61.29	47.25	102.9	120
17.9	47.59	103.6	107.75	19.6	120
72.91	102.44	120	65.58	34.7	120
56.66	39.4	40.35	95.65	48.1	120
120	120	73.8	57.64	54.5	74.6
89.3	120	60.64	59.74	39.7	120
120	116.05	113.56	52.64	30.7	120
12.3	120	57.41	63.58	33.5	120
120	89.05	42.59	29.66	120	120
69.8	15.91	11.05	9.56	27	120
9.66	120	120	6.43	24.8	95.7
120	50.91	120	46.34	120	120
65.69	33.57	100.65	13.46	120	120
41.75	45.17	47.68	65.25	22.1	120
12.01	55.7	15.32	13.5	32.5	120
19.57	120	65.66	115.7	120	120
120	92.9	116.93	81	93	120
13.02	120	45.21	104.8	68.4	120

## Sheet: figure 4B
No. of tussles in 2 hr
UAS-Kir2.1/+	R19B03-GAL4>UAS-Kir2.1	P1a-split-GAL>UAS-Kir2.1	TK-GAL4>UAS-Kir2.1	pC1-SS1>UAS-Kir2.1	pC1-SS2>UAS-Kir2.1
8	1	4	3	1	0
2	4	2	4	1	0
2	3	6	2	2	0
4	3	3	0	2	0
6	5	5	1	2	0
5	7	4	1	6	2
0	0	6	4	4	0
1	5	0	2	7	0
3	3	3	2	0	0
4	2	2	2	2	0
5	2	2	2	1	1
1	0	7	3	4	0
2	3	3	2	1	0
2	2	2	1	6	0
0	1	2	3	3	0
6	7	4	2	2	0
4	0	0	4	2	0
3	4	0	3	3	0
1	0	1	2	6	0
1	3	0	1	4	0
4	0	2	6	0	0
6	5	9	7	9	0
0	10	0	5	3	0
0	0	1	3	0	0
1	1	7	5	0	0
1	7	3	2	4	0
3	6	5	9	5	0
5	6	0	1	0	0
1	0	2	1	1	0
7	2	0	1	2	0

## Sheet: figure 4F
Tussling time (%)
1	2	3	4	5	6	Time (min)
0	0	0	0	0	0
0	0	0	0	0	0
0	0	0	0	0	0
0	0	0	0	0	0
0	0	0	0	0	0
0	0	0	0	0	0
0	0	0	0	0	0
0	0	0	0	0	0
0	0	0	0	0	0
0	0	0	0	0	0
0	0	0	0	0	0
0	0	0	0	0	0
0	0	0	0	0	0
0	0	0	0	0	0
0	0	0	0	0	0
0	0	0	0	0	0
0	0	0	0	0	0
0	0	0	0	0	0
0	0	0	0	0	0
0	0	0	0	0	0
0	0	0	0	0	0
0	0	0	0	0	0
0	0	0	0	0	0
0	0	0	0	0	0
0	0	0	0	0	0
0	0	0	0	0	0
0	0	0	0	0	0
0	0	0	0	0	0
0	0	0	0	0	0
0	0	0	0	0	0
0	0	0	0	0	0
0	0	0	0	0	0

## Sheet: figure 4G
No. of lunges
1	2	3	4	5	6	Time (min)
0	0	0	0	0	0
1	0	0	0	0	0
0	0	2	0	0	0
0	1	0	0	0	0
0	0	0	6	0	1
1	0	0	0	0	0
0	0	5	0	4	0
0	0	0	0	0	3
0	1	0	2	0	0
0	2	0	0	0	0
0	0	2	0	0	0
5	0	0	0	0	0
0	0	0	0	2	0
1	0	0	0	0	0
0	0	4	0	0	0
0	4	0	0	0	0
4	0	0	4	0	0
0	0	0	0	2	5
0	0	0	0	0	0
1	0	0	0	0	0
0	0	1	0	1	0
2	0	0	0	0	0
0	3	0	0	0	0
0	0	1	3	0	0
0	0	0	0	3	7
0	0	0	2	0	0
0	0	3	0	0	0
0	2	0	0	0	0
3	0	0	0	0	0
0	0	1	1	0	2
0	0	0	0	1	0
1	1	0	1	0	0

## Sheet: figure 4H
UWE time (%)
1	2	3	4	5	6	Time (min)
0	0	0	0	0	0
0	0	0	0	0	0
0	0	0	0	0	0
0	0	0	0	0	0
0	0	0	0	0	0
0	0	0	0	0	0
0	0	0	0	0	0
0	0	0	0	0	0
0	0	0	0	0	0
0	0	0	0	0.1	0
0	0	0	0	0	0
0	0	0	0	0	0
0	0	0	0	0	0
0	0	0	0	0	0
0	0	0	0	0	0
0	0	0	0	0	0
0	0	0	0	0.19	0
0	0	0	0	0	0
0	0	0	0	0	0
0	0	0	0	0	0
0	0	0	0	0	0
0	0	0	0	0	0
0	0.21	0	0	0	0
0	0	0	0	0	0
0	0	0	0	0	0
0	0	0	0	0	0
0	0	0	0	0	0
0	0	0	0	0	0
0	0	0	0	0	0
0	0	0	0	0	0
0	0	0	0	0	0
0	0	0	0	0	0

## Sheet: figure 4I
Tussling time (%)
1	2	3	4	5	6	Time (min)
0	0	0	0	0	0
0	0	0	0	0	0
0	0	0	0	0	0
0	0	0	0	0	0
0	0	0	0	0	0
0	0	0	0	0	0
0	0	12.28	1.47	0	0
0	13.83	11.37	2.13	0	3.53
0	3.35	0	0	0	0
0	0	0	0	0	0
0	0	0	0	0	0
0	0	0	0	0	0
0	0	0	0	0	0
0	0	0	0	0	0
0	0	0	0	0	1.25
0	0	0	0	0	0
0	0	0	0	0	0
0	0	1.82	0	0	1.28
0	0	0	0	0	0
0	0	0	0	0	0
0	2.13	0	0	0	0
0	0	0	0	0	0
0	0	0	0	0	0
0	0	0	0	0	0
0	0	0	0	0	0
0	0	0	0	0	0
0	0	0	0	0	0
0	0	0	0	0	0
0	0	0	0	0	0
0	0	0	0	0	0
0	0	0	0	0	0
0	0	0	0	0	0

## Sheet: figure 4J
No. of lunges
1	2	3	4	5	6	Time (min)
0	0	21.8139	23.9499	1	13
0	0	8	17.8856	0	6.48647
0	0	14.086	17.1878	1	18.8839
0	0	13.3882	6	0	17.3811
0	3	12.9051	15.3631	0	22.5331
0	0	10.3291	14.0753	3	24.6799
2	0	7	22.6618	0	25.485
0	0	8.1824	9.13786	3	20.9768
0	0	14	7.9035	0	12.9804
0	2	14	9	3	7.45267
0	0	23	4.2005	0	8
1	0	8	5.00552	3	12
0	0	11.6169	6.07899	0	13.5708
0	0	11.1877	8.49366	0	16.9517
0	0	10.6511	19.0661	0	24
0	1	6.84065	17	0	15.9859
0	0	5.33784	13.3775	0	7.93525
1	0	4.80135	4.68327	0	14.4831
0	3	29.6494	20	0	15.0735
0	0	7.3236	9	0	15.6099
0	0	7.91394	12.8944	1	10.2973
1	0	6.08912	3.6101	0	14
0	0	19	5.75668	0	15.6108
0	3	19.1845	14.1285	0	18
0	1	18.4868	6.66909	0	16.6829
2	0	12	18.4221	1	17.166
0	0	14.6228	8.92288	0	18.1858
0	0	4.31834	7.42044	0	19.4736
0	3	0.991008	4.25386	2	7.12999
0	0	3.08386	17	0	10.2429
0	0	21	12	1	14
0	2	20	16	2	22.1042

## Sheet: figure 4K
UWE time (%)
1	2	3	4	5	6	Time (min)
0	40.354	1.88	0	65.8407	2.23
0	38.5841	0	0	24.8673	1.03
0	37.3451	0	0	15.7522	5.28
0	35.9292	0	0	16.8142	2.57
0	35.0442	0	0	17.8761	4.1
0	33.9823	1.12	1.22	37.05	1.18
0	31.3274	0	1.13	14.8673	1.95
0	30.4425	0	1.9	17.1681	0
0	30.0885	0	0	23.3628	5.28
0	27.2566	0	0	24.0708	2.57
0	25.3097	0	0	34.9558	4.1
0	23.5398	1.12	1.22	25.6637	1.18
0	22.3009	0	1.13	36.7257	1.95
0	21.0619	0	1.9	29.2035	0
0	20.177	0.85	2.67	30.4425	0.95
0	19.115	1.88	0	30.7965	2.23
0	22.3009	0	0	31.8584	1.03
0	17.6991	0	0	42.56	5.28
0	16.6372	0	0	33.2743	2.57
0	15.7522	0	0	34.3363	4.1
0	14.5133	0.85	2.67	41.5929	0.95
0	11.8584	0	0	43.3628	2.23
0	10.9735	0	0	54.6018	1.03
0	10.2655	0	0	49.6637	5.28
0	6.0177	0	0	46.1947	2.57
0	7.43363	0	0	45.1327	4.1
0	3.53982	1.12	1.22	47.0796	1.18
0	32.7434	0	1.13	50.0885	1.95
0	7.25664	0	1.9	19.823	0
0	21.3	0.85	2.67	28.8496	0.95
0	18.04	0	0	30.0885	0.62
0	23.15	0	0	34.3363	0

## Sheet: figure 4L
Tussling time (%)
1	2	3	4	5	6	Time (min)
0	92.13	0.17	0	29.14	5.32
0	68.56	5.08	0	67.25	1.53
0	71.49	3.53	0	93.28	3.42
0	46.01	3.87	0	17.42	6.53
0	13.72	1.46	0.23	58.97	0.14
0	24.94	1.98	0	67.08	2.22
0	47.01	4.74	0	83.45	4.63
0	62.52	2.84	0	72.76	7.05
0	65.8	1.29	0	77.94	8.25
0	79.42	3.01	0	81.9	4.8
0	19.94	0.34	0.23	31.04	2.22
0	68.02	5.94	0	77.76	6.01
0	40.12	2.49	0	80.35	1.87
0	36.66	1.42	0	87.76	1.01
0	44.42	0.37	0	91.21	6.7
0	58.04	3.87	0	79.35	3.08
0	61.14	1.63	0	80.87	7.22
0	83.21	2.32	0	55.18	0.32
0	88.68	4.56	0	84.32	0.67
0	53.51	6.29	0	72.93	3.43
0	50.97	3.19	0	70.52	0.49
0	54.42	1.46	0	85.87	1.02
0	61.83	2.67	0.12	62.59	3.43
0	19.59	1.46	0	87.42	6.18
0	53.21	1.12	0	89.32	5.67
0	74.92	3.87	0	81.73	2.56
0	56.14	4.73	0.14	85.18	4.45
0	64.76	0.42	0	89.31	1.18
0	49.31	3.7	0	76.73	0.32
0	60.28	0.78	0	74.31	2.57
0	85.63	4.73	0	19.14	4.64
0	43.48	3.19	0	66.04	0.23

## Sheet: figure 4M
No. of lunges
1	2	3	4	5	6	Time (min)
0	2	5	5	4	0
0	3	2	6	1	3
0	1	3	0	2	2
0	0	4	1	6	5
0	1	6	3	0	4
0	11	6	10	4	1
0	5	0	6	6	1
0	3	1	8	3	2
0	4	0	7	5	10
0	2	0	2	0	1
0	3	4	3	1	3
0	0	8	3	5	4
0	1	6	1	1	9
1	6	5	0	3	9
0	5	4	5	2	3
2	2	1	7	0	0
0	1	2	8	3	5
0	2	3	4	7	0
0	4	0	6	5	0
0	5	0	5	3	3
0	2	7	3	1	6
0	4	5	4	5	0
0	4	2	0	2	4
0	1	2	0	0	2
2	2	2	1	1	4
0	4	4	1	4	5
0	6	5	8	3	2
0	5	7	5	5	1
0	0	1	1	0	2
0	0	2	2	3	4
0	0	7	4	5	3
0	1	4	0	2	0

[truncated: 1 more sheets: figure 4N]
