# Supplementary material for: Social experience shapes fighting strategies in Drosophila
Source: eLife. 2025 Oct 7;13:RP104212. doi: 10.7554/eLife.104212 (PMC12503488; doi:10.7554/eLife.104212)
Supplement: Figure 5—source data 1. [file elife-104212-fig5-data1.xlsx]

## Sheet: figure 5B
No. of cells per hemi-brain
P1a		pC1-SS2
fru-	fru+	fru-	fru+
4	4	3	0
2	3	4	0
6	2	3	0
2	2	3	0
5	4	3	0

## Sheet: figure 5D
No. of cells per hemi-brain
P1a		pC1-SS2
dsx-	dsx+	dsx-	dsx+
1	6	0	2
3	3	0	2
1	7	0	1
1	5	1	2
0	7	0	2
2	6	0	3
1	5	1	2
0	5	1	3
1	3	1	2

## Sheet: figure 5G
No. of cells per hemi-brain
pC1-SS2> UAS-CsChrimson	pC1-SS2 > UAS-CsChrimson & UAS-dsxM-RNAi
3	4
3	3
2	3
3	4
3	3
2	3
2	3
3	3
3	4
3

## Sheet: figure 5H
length (um)
pC1-SS2> UAS-CsChrimson	pC1-SS2 > UAS-CsChrimson & UAS-dsxM-RNAi
36.35	77.02
40.49	62.34
20.9	59.89
10.17	63.28
44.26	74.01
36.91	68.36
19.59	58.19
34.09	72.69
34.09	77.59
26.18

## Sheet: figure 5I
tussling time (%)
1	2	3	4	5	6	Time (min)
0	55.3	2.46	0	72.96	4.4
0	66.38	4.21	0	62.07	1.62
0	47.81	5.91	0	26.19	2.42
0	37.95	0.12	0.13	46.57	9.99
0	0.45	2.29	0	77.82	4.61
0	30.1	8.21	0	91.73	3.74
0	67.4	0.16	0	77.98	7.85
0	73.41	4.1	0.23	44.33	3.9
0	56.69	1.8	0	89.09	2.26
0	64.14	0.81	0	50.16	9.11
0	44.6	0.13	0	87.66	6.54
0	24.44	2.63	0	62.89	3.35

## Sheet: figure 5J
tussling time (%)
1	2	3	4	5	6	Time (min)
0	0	0	0	0	0
0	0	0	0	0	0
0	0	0	0	0	0
0	0	0	0	0	0
0	0	0	0	0	57.63
0	0.26	0	0	0	0
0	0	0	0	0	0
0	0.39	0	0	0	0.67
0	0	0	0	0	0
0	0	0	0	0	0
0	0	0	0	0	22.15
0	0	0	0	0	0

## Sheet: figure 5K
tussling time (%)
2nd min		5th min
pC1-SS2> UAS-CsChrimson	pC1-SS2 > UAS-CsChrimson & UAS-dsxM-RNAi	pC1-SS2> UAS-CsChrimson	pC1-SS2 > UAS-CsChrimson & UAS-dsxM-RNAi
55.3	0	72.96	0
66.38	0	62.07	0
47.81	0	26.19	0
37.95	0	46.57	0
0.45	0	77.82	57.63
30.1	0.26	91.73	0
67.4	0	77.98	0
73.41	0.39	44.33	0.67
56.69	0	89.09	0
64.14	0	50.16	0
44.6	0	87.66	22.15
24.44	0	62.89	0
