# Supplementary material for: Social experience shapes fighting strategies in Drosophila
Source: eLife. 2025 Oct 7;13:RP104212. doi: 10.7554/eLife.104212 (PMC12503488; doi:10.7554/eLife.104212)
Supplement: Figure 6—figure supplement 2—source data 1. [file elife-104212-fig6-figsupp2-data1.xlsx]

## Sheet: figure 6 - figure supplement 2A
% pairs perform tussling
G14-G14	S14-S14	G14-S14
58.3	0	50

## Sheet: figure 6 - figure supplement 2B
tussling duration(sec)
G14-G14	G14-S14
29	7
52	17
39	16
11	29
87	3
71	4
58	11
48	9
61	12
84	2
64	9
44	24
18	22
27	5
28	7
