# Supplementary material for: Social experience shapes fighting strategies in Drosophila
Source: eLife. 2025 Oct 7;13:RP104212. doi: 10.7554/eLife.104212 (PMC12503488; doi:10.7554/eLife.104212)
Supplement: Figure 6—figure supplement 3—source data 1. [file elife-104212-fig6-figsupp3-data1.xlsx]

## Sheet: figure 6 - figure supplement 3A
winning index (WI) / %
UAS-Kir2.1/+_a_vs_UAS-Kir2.1_b	Or47b-GAL4/UAS-Kir2.1_a_vs_Or47b-GAL4/UAS-Kir2.1_b	Or47b-GAL4/UAS-Kir2.1_vs_UAS-Kir2.1/+	pC1-SS2/UAS-Kir2.1_a_vs_pC1-SS2/UAS-Kir2.1_b	pC1-SS2/UAS-Kir2.1_vs_UAS-Kir2.1/+
40	40	-100	0	-100
100	-20	-60	0	-100
-60	-60	-100	-40	-100
-100	20	-80	40	-80
-80	0	40	80	-100
-100	20	-100	-20	-60
60	80	-100	0	-100
-40	-20	-80	20	-100
100	0	-100	-60	-80
-80	20	-100	0	-100
-40	40	-60	-20	-100
100	-20	-100	40	-100

## Sheet: figure 6 - figure supplement 3B
copulation advance index (%)
UAS-Kir2.1/+_a_vs_UAS-Kir2.1_b	Or47b-GAL4/UAS-Kir2.1_a_vs_Or47b-GAL4/UAS-Kir2.1_b	Or47b-GAL4/UAS-Kir2.1_vs_UAS-Kir2.1/+	pC1-SS2/UAS-Kir2.1_a_vs_pC1-SS2/UAS-Kir2.1_b	pC1-SS2/UAS-Kir2.1_vs_UAS-Kir2.1/+
0	0	-60	0	-20
-20	20	-100	0	-100
0	20	-80	0	-80
20	0	-40	60	-60
-20	-20	-80	0	-80
0	0	-60	-40	-40
0	0	-100	20	-60
20	20	-40	0	-60
-40	0	-80	60	-80
0	-40	-80	-20	-100
40	-20	-100	0	-40
20	0	-60	0	-60
