# Supplementary material for: Social experience shapes fighting strategies in Drosophila
Source: eLife. 2025 Oct 7;13:RP104212. doi: 10.7554/eLife.104212 (PMC12503488; doi:10.7554/eLife.104212)
Supplement: Figure 6—source data 1. [file elife-104212-fig6-data1.xlsx]

## Sheet: figure 6B
winning index (WI) / %
G7a-G7b	S7a-S7b	G7-S7
-20	80	60
40	0	-20
40	40	60
-60	-60	-20
0	0	80
-20	-20	40
0	80	0
-40	0	-40
-40	-20	-40
-20	-40	100
0	0	60
0	40	-20

## Sheet: figure 6C
winning index (WI) / %
G14a-G14b	S14a-S14b	G14-S14
-20	-100	60
40	40	-20
40	40	100
-60	-60	100
0	0	80
-20	-20	80
80	80	100
-40	-40	-100
-40	-20	-40
20	-60	100
0	0	60
100	100	60

## Sheet: figure 6E
copulation advance index (%)
G7a-G7b	S7a-S7b	G7-S7
0	0	0
20	20	-20
-40	0	0
-20	-20	0
0	0	-40
-20	-20	-20
0	0	0
20	20	20
0	0	20
20	20	0
40	0	-20
20	20	0

## Sheet: figure 6F
copulation advance index (%)
G14a-G14b	S14a-S14b	G14-S14
-20	0	40
0	0	60
0	-20	20
-20	0	-20
0	0	80
20	20	-20
-40	0	40
20	20	60
0	0	40
20	20	0
20	0	0
0	-40	20

## Sheet: figure 6G
copulation advance index (%)
G7-G14	S7-S14	G14-G21	S14-S21
40	60	20	40
80	20	60	40
20	40	60	80
60	60	0	20
60	60	60	0
20	80	60	60
80	0	80	80
40	40	100	80
60	60	40	40
0	0	80	60
60	40	60	60
40	60	80	60

## Sheet: figure 6H
copulation advance index (%)
G7-S14	S7-G14	G14-S21	S14-G21
80	20	60	-20
40	20	40	-80
60	40	80	-40
60	0	60	0
40	40	40	-60
0	-20	20	20
20	0	60	-40
40	20	40	0
80	60	40	-40
20	0	20	-20
60	20	40	0
40	20	0	-20
